# Supplementary material
Source: PubMed Central journal article supplement (PMC3760999)
Supplement: NIHMS467947-supplement-07.pdf [file NIHMS467947-supplement-07.pdf]

## INLINE SUPPLEMENTARY TABLE S1

Table S1. Numerical values of the eleven parameters that have been modified to investigate their effects on the spectra predicted by the hemodynamic model. Here,  $k$  is the asymptotic amplitude ratio of the flow velocity to blood volume oscillations, i.e.  $k = |\mathbf{f}^{(c)}|/|\mathbf{v}| \Big|_{\omega \gg \omega_c^{(\text{AutoReg})}}$  [see Eq. (41)], and is related to the inverse of the modified Grubb's exponent. The first row reports the reference set of Table II. For each of the eleven parameters, a low value (set "a") and a high value (set "b") are considered. The spectra of phase difference and amplitude ratio shown in Figs. S1-S6 correspond to the twenty-two sets of parameter values reported in this Table. The parameter values that are modified in each set are highlighted in bold face.

Table S1.

|          | $\alpha_{\dot{O}}$ (s <sup>-1</sup> ) | $\phi^{(a)}$ | $\phi^{(c)}$ | $\phi^{(v)}$ | $t^{(c)}$ (s) | $t^{(v)}$ (s) | $\frac{\omega_c^{(\text{AutoReg})}}{2\pi}$ (Hz) | $k$        | $ \mathbf{v}^{(a)} $ | $ \mathbf{v}^{(c)} $ | $ \mathbf{v}^{(v)} $ |
|----------|---------------------------------------|--------------|--------------|--------------|---------------|---------------|-------------------------------------------------|------------|----------------------|----------------------|----------------------|
| Ref. Set | 0.8                                   | 0.005        | 0.015        | 0.005        | 0.75          | 1.0           | 0.15                                            | 5          | 0.02                 | 0.02                 | 0.02                 |
| Set 1a   | <b>0.4</b>                            | 0.005        | 0.015        | 0.005        | 0.75          | 1.0           | 0.15                                            | 5          | 0.02                 | 0.02                 | 0.02                 |
| Set 1b   | <b>1.2</b>                            | 0.005        | 0.015        | 0.005        | 0.75          | 1.0           | 0.15                                            | 5          | 0.02                 | 0.02                 | 0.02                 |
| Set 2a   | 0.8                                   | <b>0.001</b> | 0.015        | 0.005        | 0.75          | 1.0           | 0.15                                            | 5          | 0.02                 | 0.02                 | 0.02                 |
| Set 2b   | 0.8                                   | <b>0.015</b> | 0.015        | 0.005        | 0.75          | 1.0           | 0.15                                            | 5          | 0.02                 | 0.02                 | 0.02                 |
| Set 3a   | 0.8                                   | 0.005        | <b>0.005</b> | 0.005        | 0.75          | 1.0           | 0.15                                            | 5          | 0.02                 | 0.02                 | 0.02                 |
| Set 3b   | 0.8                                   | 0.005        | <b>0.030</b> | 0.005        | 0.75          | 1.0           | 0.15                                            | 5          | 0.02                 | 0.02                 | 0.02                 |
| Set 4a   | 0.8                                   | 0.005        | 0.015        | <b>0.001</b> | 0.75          | 1.0           | 0.15                                            | 5          | 0.02                 | 0.02                 | 0.02                 |
| Set 4b   | 0.8                                   | 0.005        | 0.015        | <b>0.015</b> | 0.75          | 1.0           | 0.15                                            | 5          | 0.02                 | 0.02                 | 0.02                 |
| Set 5a   | 0.8                                   | 0.005        | 0.015        | 0.005        | <b>0.3</b>    | 1.0           | 0.15                                            | 5          | 0.02                 | 0.02                 | 0.02                 |
| Set 5b   | 0.8                                   | 0.005        | 0.015        | 0.005        | <b>1.0</b>    | 1.0           | 0.15                                            | 5          | 0.02                 | 0.02                 | 0.02                 |
| Set 6a   | 0.8                                   | 0.005        | 0.015        | 0.005        | 0.75          | <b>0.4</b>    | 0.15                                            | 5          | 0.02                 | 0.02                 | 0.02                 |
| Set 6b   | 0.8                                   | 0.005        | 0.015        | 0.005        | 0.75          | <b>2.0</b>    | 0.15                                            | 5          | 0.02                 | 0.02                 | 0.02                 |
| Set 7a   | 0.8                                   | 0.005        | 0.015        | 0.005        | 0.75          | 1.0           | <b>0.03</b>                                     | 5          | 0.02                 | 0.02                 | 0.02                 |
| Set 7b   | 0.8                                   | 0.005        | 0.015        | 0.005        | 0.75          | 1.0           | <b>0.3</b>                                      | 5          | 0.02                 | 0.02                 | 0.02                 |
| Set 8a   | 0.8                                   | 0.005        | 0.015        | 0.005        | 0.75          | 1.0           | 0.15                                            | <b>2.5</b> | 0.02                 | 0.02                 | 0.02                 |
| Set 8b   | 0.8                                   | 0.005        | 0.015        | 0.005        | 0.75          | 1.0           | 0.15                                            | <b>10</b>  | 0.02                 | 0.02                 | 0.02                 |
| Set 9a   | 0.8                                   | 0.005        | 0.015        | 0.005        | 0.75          | 1.0           | 0.15                                            | 5          | <b>0</b>             | 0.02                 | 0.02                 |
| Set 9b   | 0.8                                   | 0.005        | 0.015        | 0.005        | 0.75          | 1.0           | 0.15                                            | 5          | <b>0.1</b>           | 0.02                 | 0.02                 |
| Set 10a  | 0.8                                   | 0.005        | 0.015        | 0.005        | 0.75          | 1.0           | 0.15                                            | 5          | 0.02                 | <b>0</b>             | 0.02                 |
| Set 10b  | 0.8                                   | 0.005        | 0.015        | 0.005        | 0.75          | 1.0           | 0.15                                            | 5          | 0.02                 | <b>0.1</b>           | 0.02                 |
| Set 11a  | 0.8                                   | 0.005        | 0.015        | 0.005        | 0.75          | 1.0           | 0.15                                            | 5          | 0.02                 | 0.02                 | <b>0</b>             |
| Set 11b  | 0.8                                   | 0.005        | 0.015        | 0.005        | 0.75          | 1.0           | 0.15                                            | 5          | 0.02                 | 0.02                 | <b>0.1</b>           |
